# Supplementary material
Source: PubMed Central journal article supplement (PMC4335659)
Supplement: NIHMS617854-supplement-7.pdf [file NIHMS617854-supplement-7.pdf]

| Patient ID | % MD | Age | Menopausal Status | Parity      | Biopsy Type | Benign Diagnosis               | Tissues stained for CD36 in DeFilippis et al 2012 | Tissues in Figure 1A and Supp. Figure 1A | Tissues in Figure 1B and Supp. Figure 1B |
|------------|------|-----|-------------------|-------------|-------------|--------------------------------|---------------------------------------------------|------------------------------------------|------------------------------------------|
| LD1        | 29.9 | 52  | Unknown           | Nulliparous | excisional  | SCA                            | x                                                 |                                          |                                          |
| LD2        | 30.2 | 46  | Pre               | Parous      | excisional  | NSPA (AM, CY, FBA, PASH & UDH) | x                                                 | x                                        | x                                        |
| LD3        | 31.2 | 50  | Unknown           | Parous      | excisional  | NSPA (AM, C, CY, P, SCA & UDH) | x                                                 | x                                        | x                                        |
| LD4        | 31.9 | 42  | Unknown           | Parous      | excisional  | NSPA (CY)                      | x                                                 | x                                        | x                                        |
| LD5        | 33.2 | 41  | Unknown           | Parous      | excisional  | NSPA (FBA)                     | x                                                 | x                                        | x                                        |
| LD6        | 35.5 | 61  | Post              | Parous      | excisional  | NSPA (SCA)                     | x                                                 | x                                        | x                                        |
| LD7        | 36.1 | 46  | Pre               | Parous      | excisional  | NSPA (PASH)                    | x                                                 | x                                        | x                                        |
| LD8        | 37.0 | 54  | Unknown           | Parous      | excisional  | F & UDH                        | x                                                 | x                                        | x                                        |
| LD9        | 37.9 | 34  | Pre               | Parous      | excisional  | NSPA (UDH)                     | x                                                 | x                                        | x                                        |
| LD10       | 39.7 | 45  | Unknown           | Nulliparous | excisional  | FBA                            | x                                                 | x                                        | x                                        |
| LD11       | 41.6 | 47  | Pre               | Nulliparous | excisional  | CY (UDH)                       | x                                                 | x                                        | x                                        |
| LD12       | 46.3 | 45  | Pre               | Nulliparous | excisional  | FBA                            | x                                                 | x                                        | x                                        |
| LD13       | 46.3 | 46  | Unknown           | Nulliparous | excisional  | NSPA                           | x                                                 | x                                        | x                                        |
| HD1        | 70.5 | 41  | Pre               | Parous      | core        | FBA                            | x                                                 | x                                        |                                          |
| HD2        | 70.7 | 61  | Post              | Nulliparous | core        | AM, C & CY                     | x                                                 | x                                        | x                                        |
| HD3        | 73.8 | 52  | Post              | Parous      | excisional  | NSPA                           | x                                                 | x                                        | x                                        |
| HD4        | 74.8 | 39  | Pre               | Parous      | core        | NSPA                           | x                                                 | x                                        | x                                        |
| HD5        | 75.1 | 31  | Pre               | Nulliparous | core        | NSPA (FBA)                     | x                                                 | x                                        | x                                        |
| HD6        | 79.0 | 40  | Post              | Nulliparous | core        | FBA                            | x                                                 | x                                        | x                                        |
| HD7        | 80.1 | 33  | Pre               | Nulliparous | core        | NSPA                           | x                                                 | x                                        | x                                        |
| HD8        | 80.4 | 53  | Unknown           | Nulliparous | excisional  | F, FBA & SCA (C)               | x                                                 | x                                        |                                          |
| HD9        | 81.7 | 50  | Unknown           | Nulliparous | core        | P                              | x                                                 | x                                        |                                          |
| HD10       | 82.4 | 40  | Pre               | Nulliparous | core        | C & UDH (NSPA)                 | x                                                 | x                                        | x                                        |
| HD11       | 83.2 | 37  | Pre               | Parous      | core        | NSPA                           | x                                                 | x                                        | x                                        |
| HD12       | 84.4 | 50  | Pre               | Nulliparous | core        | P, SCA & UDH                   | x                                                 | x                                        | x                                        |
| HD13       | 84.9 | 34  | Pre               | Nulliparous | core        | NSPA                           | x                                                 | x                                        | x                                        |
| HD14       | 85.0 | 36  | Pre               | Nulliparous | excisional  | FBA                            | x                                                 | x                                        | x                                        |

**Abbreviations:**

A = Atrophy  
ADH = Atypical Ductal Hyperplasia  
ALH = Atypical Lobular Hyperplasia  
AM = Apocrine Metaplasia  
C = Calcification  
CY = Cysts  
F = Fibrosis  
FBA = Fibroadenoma  
FEA = Flat Epithelial Atypia  
G = Granulation  
MDE = Mammary Duct Ectasia  
N = Necrosis  
NSPA = No Specific Pathology  
P = Papilloma  
PASH = Pseudo-angiomatosis Stromal Hyperplasia  
RS = Radial Scar  
SCA = Sclerosing Adenosis  
UDH = Unusual Ductal Hyperplasia

**Supplementary Table 1**
