# Supplementary material
Source: PubMed Central journal article supplement (PMC4335659)
Supplement: NIHMS617854-supplement-8.pdf [file NIHMS617854-supplement-8.pdf]

| Patient Identifier | % MD       | Age     | Menopausal Status | vHMEC in Figures 2A, 3A&B and Supp. Figures 2A, 3A&B | vHMEC in Figures 2B&3C & Supp. Figure 3C | vHMEC in Figure 2C | HMEC in Figure 2C | HMF in Figure 2C | vHMEC in Figure 3D | vHMEC in Figure 4A (left & middle) & Supp. Figure 4C | vHMEC in Figure 4A (right) & Supp. Figure 4A |
|--------------------|------------|---------|-------------------|------------------------------------------------------|------------------------------------------|--------------------|-------------------|------------------|--------------------|------------------------------------------------------|----------------------------------------------|
| LD1                | 25%<MD<50% | 47      | post              | x                                                    | x                                        |                    | x                 | x                |                    | x                                                    | x                                            |
| LD2                | 25%<MD<50% | 19      | pre               | x                                                    | x                                        | x                  | x                 | x                | x                  | x                                                    | x                                            |
| LD3                | 25%<MD<50% | 66      | post              |                                                      | x                                        | x                  | x                 | x                | x                  | x                                                    | x                                            |
| LD4                | 25%<MD<50% | 56      | pre               |                                                      |                                          |                    |                   |                  |                    |                                                      |                                              |
| LD5                | 25%<MD<50% | 52      | post              |                                                      |                                          |                    |                   |                  |                    |                                                      |                                              |
| LD6                | 25%<MD<50% | 41      | pre               | x                                                    | x                                        | x                  |                   | x                |                    | x                                                    | x                                            |
| LD8                | 25%<MD<50% | 41      | pre               |                                                      | x                                        |                    | x                 | x                |                    |                                                      | x                                            |
| LD9                | 25%<MD<50% | 65      | post              |                                                      |                                          |                    | x                 |                  |                    |                                                      |                                              |
| LD10               | 25%<MD<50% | 52      | post              |                                                      | x                                        | x                  |                   | x                | x                  | x                                                    | x                                            |
| HD1                | MD>75%     | 52      | post              |                                                      | x                                        | x                  |                   | x                |                    | x                                                    | x                                            |
| HD2                | MD>75%     | 37      | pre               |                                                      |                                          |                    |                   |                  |                    |                                                      |                                              |
| HD3                | MD>75%     | 42      | pre               | x                                                    | x                                        | x                  | x                 | x                | x                  | x                                                    | x                                            |
| HD4                | MD>75%     | 36      | pre               |                                                      | x                                        | x                  | x                 |                  |                    |                                                      |                                              |
| HD5                | MD>75%     | 45      | pre               |                                                      |                                          |                    |                   |                  |                    |                                                      |                                              |
| HD6                | MD>75%     | 19      | pre               | x                                                    | x                                        |                    |                   |                  |                    | x                                                    |                                              |
| HD7                | MD>75%     | 50      | peri              |                                                      |                                          |                    |                   |                  |                    |                                                      |                                              |
| HD8                | MD>75%     | unknown | unknown           |                                                      |                                          |                    | x                 |                  |                    |                                                      |                                              |
| HD9                | MD>75%     | 37      | pre               |                                                      | x                                        | x                  |                   | x                | x                  | x                                                    | x                                            |
| HD10               | MD>75%     | 53      | peri              | x                                                    | x                                        | x                  | x                 | x                | x                  | x                                                    | x                                            |

**Supplementary Table 2**
