# Supplementary material
Source: PubMed Central journal article supplement (PMC4335659)
Supplement: NIHMS617854-supplement-9.pdf [file NIHMS617854-supplement-9.pdf]

| Patient Identifier | Age | vHMEC in Supp. Figure 2B | RMF in Figure 4A (left) | RMF in Figure 4B (left) | RMF in Figure 4B (right) | RMF in Figure 4C&D | vHMEC in Figure 4C&D and Supp. Figure 4B | RMF in Supp. Figure 4D | RMF in Figure 5A | RMF in Figure 5B | RMF in Figure 5C and Supp. Figure 5 | RMF in Figure 5D | RMF in Figure 6A | RMF in Figure 6B (left) | RMF in Figure 6B (right) |
|--------------------|-----|--------------------------|-------------------------|-------------------------|--------------------------|--------------------|------------------------------------------|------------------------|------------------|------------------|-------------------------------------|------------------|------------------|-------------------------|--------------------------|
| RM9                | 35  |                          |                         |                         |                          |                    |                                          | x                      |                  |                  |                                     |                  |                  |                         |                          |
| RM15               | 66  | x                        | x                       |                         |                          | x                  |                                          |                        |                  |                  |                                     |                  | x                |                         |                          |
| RM16               | 47  | x                        |                         |                         |                          |                    |                                          |                        |                  |                  |                                     |                  |                  |                         |                          |
| RM18               | 47  |                          |                         | x                       |                          |                    |                                          |                        |                  | x                |                                     |                  |                  |                         | x                        |
| RM21               | 45  |                          |                         |                         |                          | x                  |                                          |                        |                  |                  |                                     |                  |                  |                         |                          |
| RM78               | 61  |                          |                         |                         |                          |                    | x                                        |                        |                  |                  |                                     |                  |                  |                         |                          |
| RM79               | 31  |                          |                         |                         |                          |                    | x                                        |                        |                  |                  |                                     |                  |                  |                         |                          |
| RM111              | 54  |                          |                         |                         |                          |                    |                                          | x                      | x                |                  | x                                   | x                |                  |                         |                          |
| RM124              | 32  |                          |                         |                         |                          |                    |                                          |                        |                  |                  | x                                   | x                |                  |                         |                          |
| RM128              | 20  |                          |                         |                         |                          |                    |                                          |                        |                  |                  | x                                   | x                |                  |                         |                          |
| RM130              | 18  |                          |                         |                         |                          |                    |                                          |                        |                  |                  | x                                   |                  |                  |                         |                          |
| RM156              | 47  |                          |                         |                         | x                        |                    |                                          |                        |                  | x                |                                     |                  |                  | x                       |                          |
| RM164              | 46  |                          | x                       | x                       |                          |                    |                                          |                        |                  |                  |                                     |                  | x                | x                       | x                        |

NOTE: Red x denotes an RMF in which the experiment was performed but the data are not shown in figure.

### Supplementary Table 3
