# Supplementary material
Source: PubMed Central journal article supplement (PMC4335659)

**A**

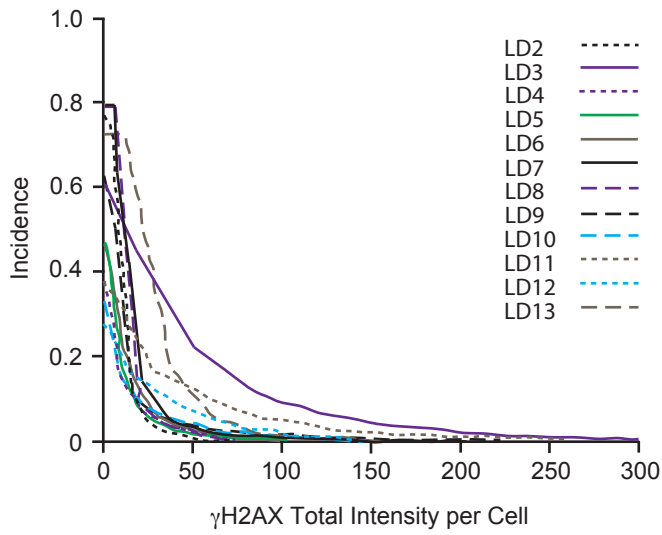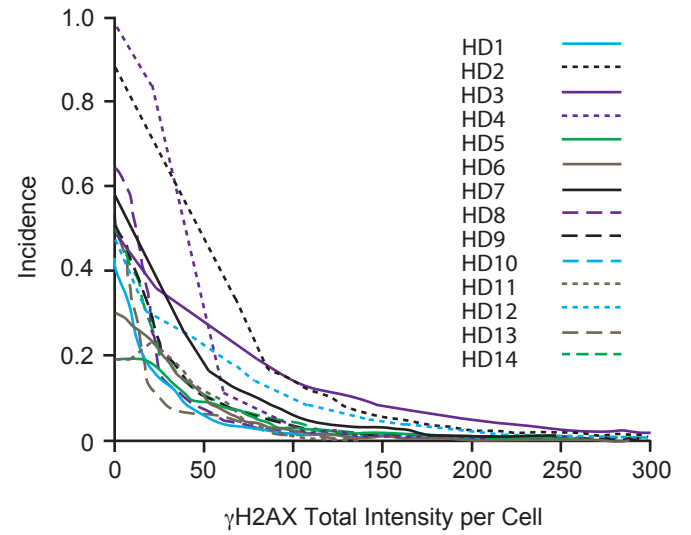

**B**

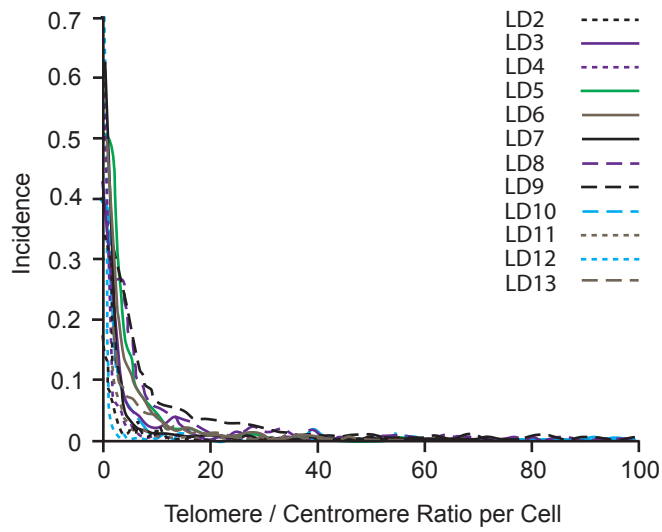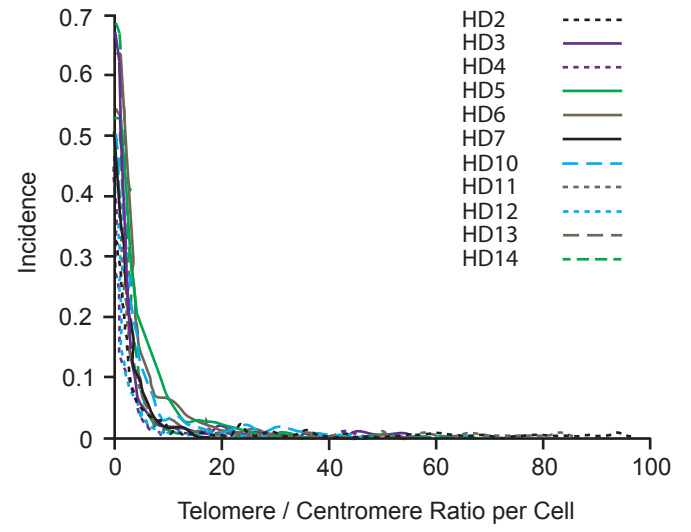

Supplement: NIHMS617854-supplement-2.pdf [file NIHMS617854-supplement-2.pdf]
